# Supplementary material for: Sequence-Based SSR Marker Development and Their Application in Defining the Introgressions of LA0716 (Solanum pennellii) in the Background of cv. M82 (Solanum lycopersicum)
Source: PLoS One. 2013 Dec 5;8(12):e81091. doi: 10.1371/journal.pone.0081091 (PMC3855227; doi:10.1371/journal.pone.0081091)
Supplement: Table S3 — Comparative analysis of introgressions in 75 introgression lines (ILs) from the cross between LA0716 ( S. pennellii ) × cv. M82 ( S. lycopersicum ). (XLS) [file pone.0081091.s003.xls]

## Sheet: RPS vs. RGS
Supplemental Table 3. Comparative analysis of introgressions in 75 introgression lines (ILs) from the cross between LA0716 (S. pennellii) × cv. M82 (S. lycopersicum)
Accession number from TGRC	Introgression lines (ILs)	Relative physical size (RPS, %)	Relative genetic size (RGS, %)	RPS/RGS
LA3476/LA4028	IL1-1	48	41.4918	1.15685
LA4029	IL1-1-2	3.0971	4.2735	0.72472
LA4030	IL1-1-3	14.6851	6.91531	2.12356
LA4031	IL1-2	42.0843	33.7995	1.24511
LA3478/ LA4032	IL1-3	30.8704	28.5159	1.08257
LA4033	IL1-4	26.6109	30.8469	0.862676
LA4034	IL1-4-18	2.81152	3.1857	0.882543
LA3480/LA4035	IL2-1N	Not detected	Not detected	Not detected
LA4036	IL2-1-1	3.38083	0	>1
LA4037	IL2-2	6.75595	5.19373	1.30079
LA4038	IL2-3	21.8983	33.4707	0.654252
LA3483/LA4039	IL2-4	19.6653	22.7535	0.864278
LA4040	IL2-5	24.8451	36.3561	0.683381
LA4041	IL2-6	10.6736	18.4666	0.577994
LA4042	IL2-6-5	3.57214	5.27617	0.677033
LA4043	IL3-1	7.84678	19.8198	0.395906
LA4044	IL3-2L	36.7582	23.751	1.54765
LA3488	IL3-3	44.3592	23.9967	1.84855
LA3489/LA4046	IL3-4	34.1326	34.2342	0.997031
LA4047	IL3-5	20.627	23.9967	0.859577
LA4048	IL4-1	29.7729	28.5838	1.0416
LA4049	IL4-1-1	3.67823	0	>1
LA3492/LA4050	IL4-2	21.3312	29.6264	0.720007
LA4051	IL4-3	58.7571	58.9053	0.997484
LA4052	IL4-3-2S	17.5331	8.86186	1.97849
LA3494/LA4053	IL4-4	20.2334	20.7646	0.974422
LA4054	IL5-1	12.6894	14.5179	0.874053
LA4055	IL5-2S	58.7121	41.3868	1.41862
LA3497/LA4056	IL5-3	16.3555	28.169	0.580621
LA4057	IL5-4	8.92857	16.0347	0.556829
LA4058	IL5-5	12.0333	12.2427	0.982895
LA4059	IL6-1N	Not detected	Not detected	Not detected
LA3501/LA4060	IL6-2	35.8536	47.3964	0.756463
LA4062	IL6-3S	13.6343	39.5324	0.344888
LA4063	IL6-4	4.99254	10.0956	0.494524
LA4064	IL7-1	5.75064	15.3499	0.374637
LA3505/LA4065	IL7-2	28.602	59.2551	0.482692
LA4066	IL7-3	21.3948	36.1174	0.592367
LA4067	IL7-4S	10.1072	54.5147	0.185403
LA4068	IL7-4-1	70.724	34.763	2.03446
LA4069	IL7-5	10.5	11.851	0.852854
LA4070	IL7-5-5	9.46604	11.851	0.798753
LA4071	IL8-1S	34.0863	34.9666	0.974826
LA4072	IL8-1-1	34.0863	13.2517	2.57223
LA4073	IL8-1-3	15.2987	0	>1
LA4074	IL8-2	44.3164	60.5791	0.731546
LA4075	IL8-2-1	36.4226	34.9666	1.04164
LA4076	IL8-3	18.695	37.3051	0.501138
LA4077	IL8-3-1	3.99321	6.34744	0.629105
LA4078	IL9-1	32.3255	41.0632	0.787214
LA4079	IL9-1-2	14.8285	16.4986	0.898772
LA4080	IL9-1-3	31.542	32.9056	0.95856
LA4081	IL9-2	42.0979	34.0972	1.23464
LA4082	IL9-2-5	7.09639	9.25756	0.766551
LA4083	IL9-2-6S	7.17771	7.97434	0.900101
LA4084	IL9-3	44	41.1549	1.1
LA4085	IL9-3-1	29.1396	27.5894	1.05619
LA4086	IL9-3-2	18.9015	17.5069	1.07966
LA4087	IL10-1	48.3568	38.676	1.25031
LA4088	IL10-1-1	20.8777	13.9373	1.49797
LA4089	IL10-2S	34.432	43.9024	0.784284
LA4090	IL10-2-2	12.614	13.2404	0.952688
LA4091	IL10-3N	Not detected	Not detected	Not detected
LA3518/LA4092	IL11-1	33.807	32.1893	1.05025
LA4093	IL11-2	54.8392	27.8107	1.97188
LA4094	IL11-3	36.2	36.0947	0.958361
LA4095	IL11-4	11.6861	10.1775	1.14823
LA4096	IL11-4-1	4.54578	5.56213	0.817272
LA4097	IL12-1	4.832	15.4018	0.31373
LA4098	IL12-1-1	3.51289	8.25893	0.425344
LA4099	IL12-2	35.2924	48.6607	0.725276
LA4100	IL12-3L	89.1876	42.9688	2.07564
LA4101	IL12-3-1L	24.8676	4.12946	6.02198
LA4102	IL12-4S	3.76178	29.3527	0.128158
LA4103	IL12-4-1	1.06667	2.00893	0.530963
RPS: relative physical size (introgression euchromatin physical size/ chromosome euchromatin physical size); RGS: relative genetic size (introgression euchromatin CM/chromosome euchromatin CM), euchromatin and heterochromatin regions were based on previous reports. S: shorter than the bin defined by the RFLPs; L: longer than the bin defined by the RFLPs; N: not detected.
